# Supplementary material
Source: PubMed Central journal article supplement (PMC2494926)
Supplement: M710017200_1.pdf [file M710017200_1.pdf]

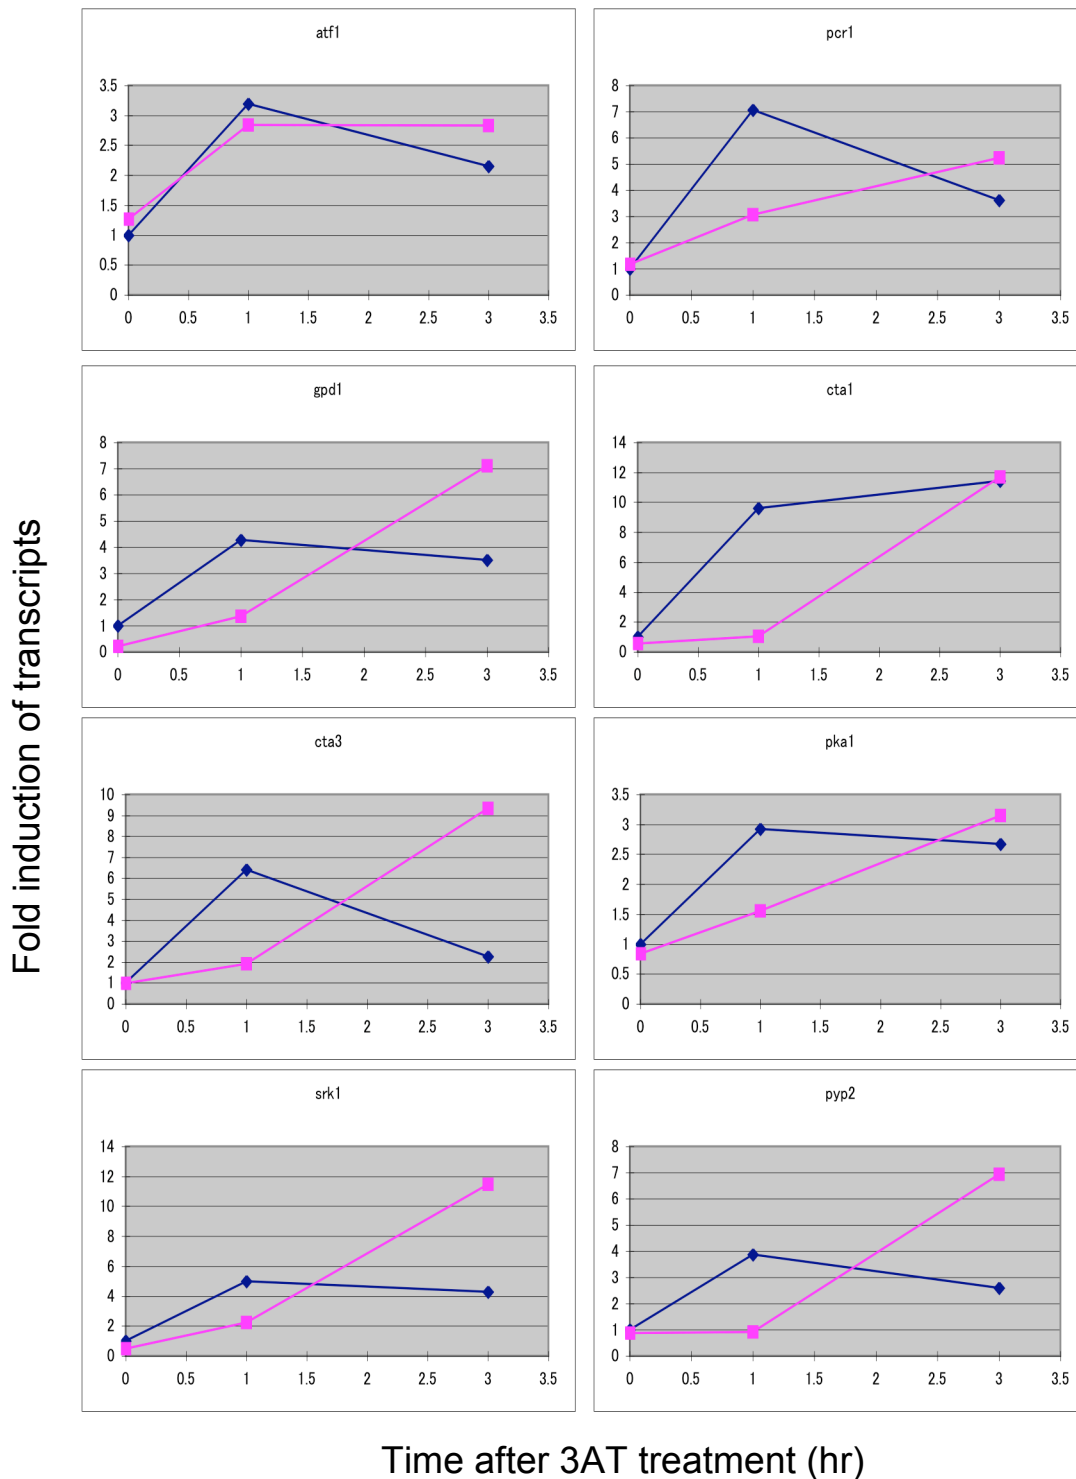

**Fig. S1.** 3AT-induced transcription profiles were plotted for selected cluster 2 (CESR) genes. Employed were microarray data from wild-type (purple) and *int6Δ* (pink) cells.
