# Supplementary material
Source: PubMed Central journal article supplement (PMC2494926)
Supplement: M710017200_2.pdf [file M710017200_2.pdf]

## Udagawa et al. Fig S2

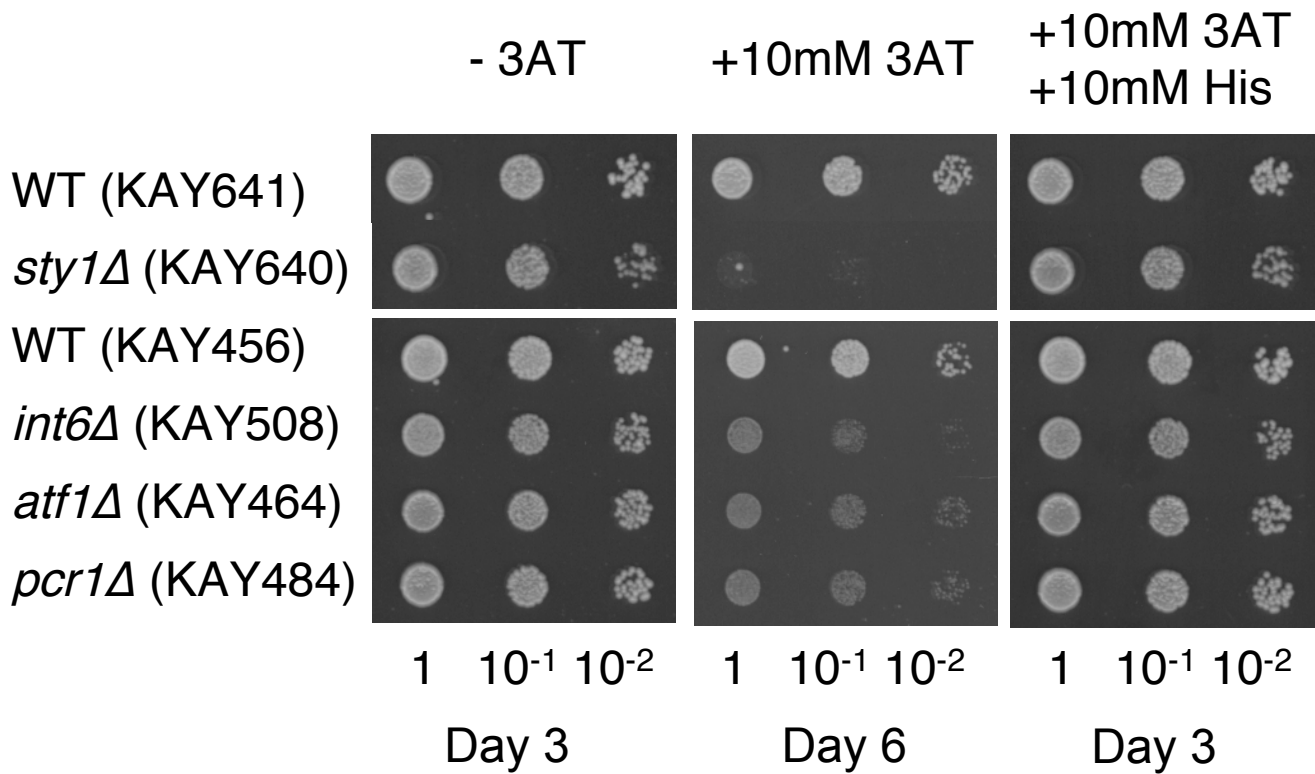

**Fig. S2. Histidine reverses 3AT sensitivity of Sty1 signaling mutants.** Cultures of strains indicated to the left (Table 1) and its serial dilutions, as indicated on the bottom of the pictures, were spotted on solid EMM-C medium with supplements indicated across the top. Plates were incubated for the time indicated to the bottom and then the pictures were taken for each plate.
